# Supplementary material for: Transition metal complexes containing the S(NtBu)42− tetraimidosulfate dianion
Source: Royal Society of Chemistry journal article supplement (doi:10.1039/c4dt01995d), 2014-01-01
Supplement: c4dt01995d1.pdf [file c4dt01995d1.pdf]

## Electronic Supporting Information

### Transition Metal Complexes Containing the $S(NtBu)_4^{2-}$ Tetraimido-sulfate Dianion

by

Julia Matussek, Regine Herbst-Irmer, Ina Objartel and Dietmar Stalke

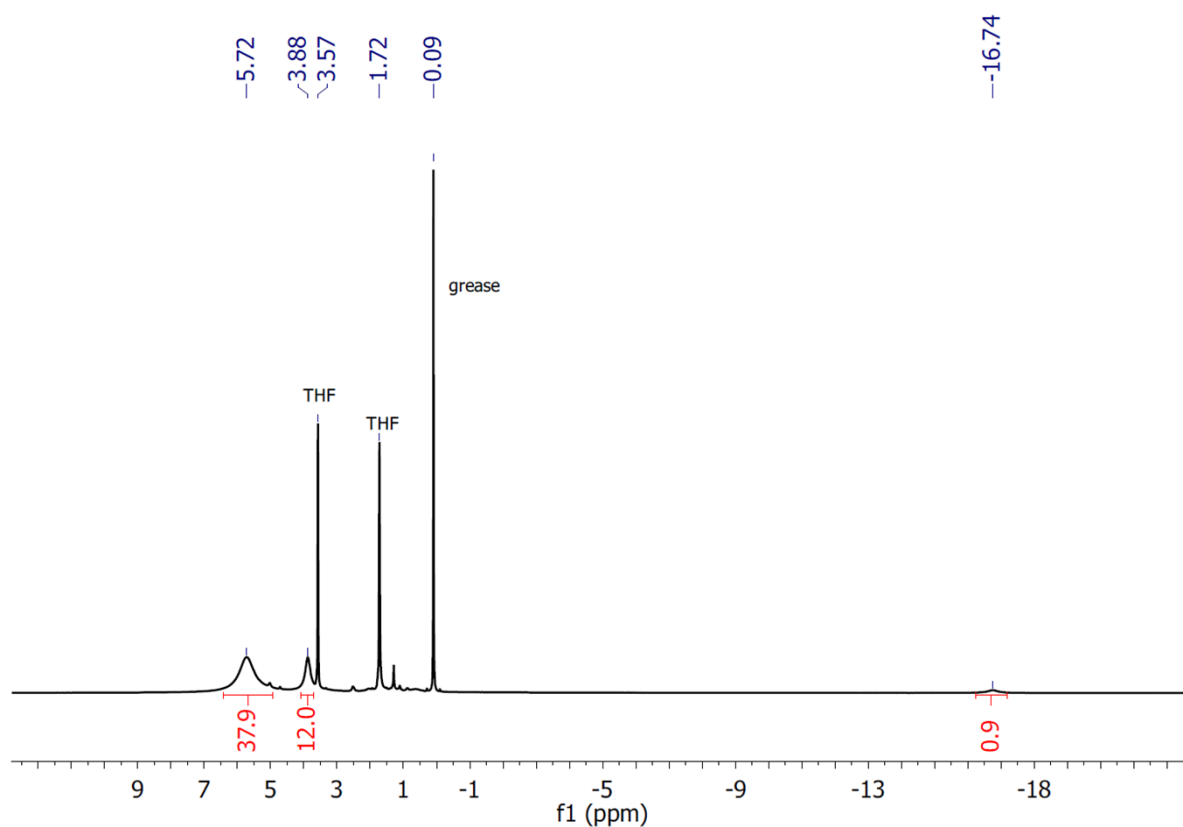

**Figure S1.**  $^1\text{H-NMR}$  spectrum of the paramagnetic  $[(\text{acac})_2\text{Cu}_2(\text{NtBu})_4\text{S}]$  (**3**) depicting the presence of silicon joint grease.
